# Supplementary material for: De novo assembly and annotation of Popillia japonica’s genome with initial clues to its potential as an invasive pest
Source: PubMed Central journal article supplement (PMC10936072; doi:10.1186/s12864-024-10180-x), 2024-03-13
Supplement: 12864_2024_10180_MOESM2_ESM.pdf [file 12864_2024_10180_MOESM2_ESM.pdf]

Nx

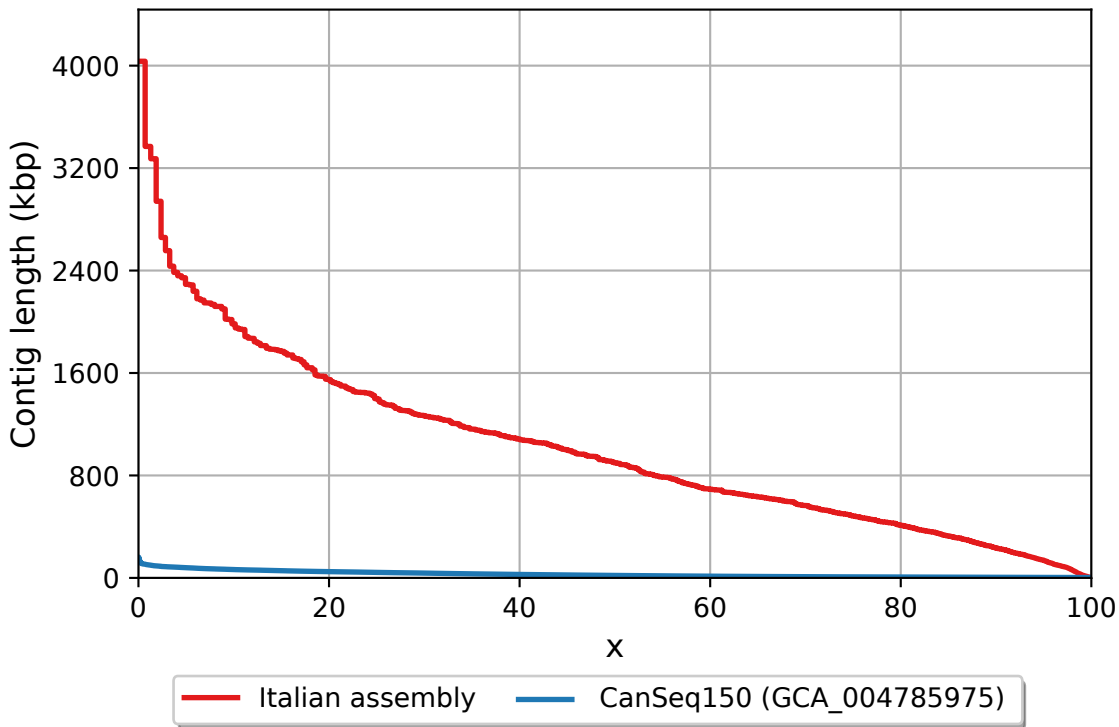

Supplementary Figure 2. QUAST-LG Nx comparison between the Italian genome and the CanSeq150 Canadian genome. The contiguity of the new Italian assembly is extremely higher than the CanSeq150 genome.
